# Supplementary material for: Global metabolomics profiling of colorectal cancer in Malaysian patients
Source: PubMed Central journal article supplement — Bioimpacts. 2020 Mar 24;11(1):33–43. doi: 10.34172/bi.2021.05 (PMC7803921; doi:10.34172/bi.2021.05), 2020-03-24
Supplement: bi-11-33-s001.pdf [file bi-11-33-s001.pdf]

Amir Hashim et al., *BiolImpacts*, 2021, 11(1), 33-43

doi: [10.34172/bi.2021.05](https://doi.org/10.34172/bi.2021.05)

<http://bi.tbzmed.ac.ir/>

## **Global metabolomics profiling of colorectal cancer in Malaysian patients**

**Nurul Azmir Amir Hashim<sup>1,2</sup>, Sharaniza Ab-Rahim<sup>1</sup>, Wan Zurinah Wan Ngah<sup>3</sup>, Sheila Nathan<sup>4</sup>, Nurul Syakima Ab Mutalib<sup>5</sup>, Ismail Sagap<sup>6</sup>, A. Rahman A. Jamal<sup>5</sup>, Musalmah Mazlan<sup>1\*</sup>**

<sup>1</sup> Department of Biochemistry and Molecular Medicine, Faculty of Medicine, Universiti Teknologi MARA, Cawangan Selangor, Kampus Sungai Buloh, 47000 Sungai Buloh, Selangor, Malaysia

<sup>2</sup> Institute of Medical and Molecular Biotechnology, Faculty of Medicine, Universiti Teknologi MARA, Cawangan Selangor, Kampus Sungai Buloh, 47000 Sungai Buloh, Selangor, Malaysia

<sup>3</sup> Universiti Kebangsaan Malaysia Medical Centre, Jalan Yaacob Latif, Bandar Tun Razak, 56000 Batu 9 Cheras, Wilayah Persekutuan Kuala Lumpur, Malaysia

<sup>4</sup> Faculty of Science and Technology, Universiti Kebangsaan Malaysia, 43600 UKM Bangi, Selangor, Malaysia

<sup>5</sup> UKM Medical Molecular Biology Institute (UMBI), UKM Medical Centre, Universiti Kebangsaan Malaysia, Jalan Yaacob Latiff, Bandar Tun Razak, 56000 Cheras, Kuala Lumpur, Malaysia

<sup>6</sup> Department of Surgery, Faculty of Medicine, Universiti Kebangsaan Malaysia, Jalan Yaacob Latiff, Bandar Tun Razak, 56000 Cheras, Kuala Lumpur, Malaysia

## Supplementary file 1

Table S1. LCMS/QTOF intensity readings for the 11 identified differential metabolites in normal healthy controls.

| Compound        | A02      | A03      | A04      | A07      | A08      | A09      | A10      | A11      | A12      | B01      |
|-----------------|----------|----------|----------|----------|----------|----------|----------|----------|----------|----------|
| Methionine      | 0.939837 | 0.954792 | 0.379128 | 0.283476 | -0.73946 | -0.05553 | -17.2338 | -16.1613 | -1.19253 | -0.27766 |
| Acetylcarnitine | -0.25718 | -0.39982 | -1.08159 | -1.7455  | -1.70545 | -1.21752 | -1.23084 | 0.498238 | 15.47497 | -0.59527 |
| LysoPE          | 2.415915 | 0.115127 | 2.019341 | 2.780739 | 1.455385 | 1.265194 | 6.064514 | 7.060195 | 21.68113 | 1.698626 |
| LysoPC          | 0.279353 | -0.02513 | 0.645247 | 1.127947 | 0.125347 | 1.067127 | 5.374449 | 5.494617 | 21.33356 | 0.004461 |
| Uric acid       | 0.938346 | 0.863342 | 0.424258 | 0.218883 | -0.20885 | -18.5859 | -18.5086 | -17.4361 | -2.46734 | 0.140946 |
| Pipecolic acid  | 0.572307 | 0.28064  | 0.203773 | 0.729171 | 0.126668 | 0.065019 | 1.574855 | 2.373339 | 17.54675 | 0.127002 |
| Tyrosine        | 0.251606 | 0.435033 | -0.33036 | -0.05913 | -1.17484 | -0.24227 | -20.4736 | -19.4011 | -4.43233 | -0.72115 |
| 5-Oxoproline    | 0.170375 | 0.19751  | -18.3361 | -0.62214 | -1.79241 | -0.59683 | -18.2811 | -17.2085 | -2.23982 | -0.40577 |
| Hypoxanthine    | 0.058626 | -0.23791 | 0.139814 | -0.06819 | -0.37824 | -0.61579 | -17.314  | -16.2414 | -1.27271 | -0.80691 |
| Xanthine        | -0.70039 | -15.0444 | -14.547  | -0.71126 | -14.7365 | -1.05825 | -17.3786 | -16.3935 | -16.3858 | -15.0539 |
| Citric acid     | -0.7552  | -1.48348 | -0.98232 | -2.18712 | -2.20837 | -1.21089 | -2.72515 | -1.21969 | -0.62205 | -1.07384 |

  

| Compound        | B02      | B03      | B04      | B05      | B06      | B07      | B09      | B10      | B11      | B12      |
|-----------------|----------|----------|----------|----------|----------|----------|----------|----------|----------|----------|
| Methionine      | -0.01816 | -1.19253 | 0.171526 | -1.19253 | -1.19253 | -0.76475 | 0.091221 | -17.3488 | -17.0041 | -5.03465 |
| Acetylcarnitine | -0.64324 | -6.37668 | -1.61899 | -6.37668 | -6.37668 | -21.1041 | -1.17621 | -0.36974 | -0.50399 | 11.76412 |
| LysoPE          | 1.386852 | 0        | 2.414848 | 0        | 0        | 2.929154 | 2.714359 | 5.851688 | 6.385513 | 18.49313 |
| LysoPC          | 0.080528 | 0        | 0.612581 | 0        | 0        | 0.174278 | 1.017227 | 5.409569 | 5.790896 | 17.59501 |
| Uric acid       | 0.597829 | -2.46734 | -18.6125 | -2.46734 | -2.46734 | -17.1947 | 0.363372 | -18.6236 | -18.2789 | -6.30946 |
| Pipecolic acid  | 0.170245 | -0.41041 | 0.611472 | -0.41041 | -0.41041 | -15.1378 | 0.427959 | 1.272952 | 1.944434 | 13.70103 |
| Tyrosine        | -0.08593 | 13.75202 | -0.53287 | -4.43233 | -4.43233 | 0.387224 | 0.175765 | -20.5886 | -20.2439 | -8.27445 |
| 5-Oxoproline    | -0.44108 | 14.13914 | -0.12602 | 14.70023 | 14.57103 | -16.9672 | -0.92452 | -18.3961 | -18.0514 | -6.08194 |
| Hypoxanthine    | -17.3435 | 16.32364 | 0.057854 | 15.05875 | -1.27271 | -16.0001 | -0.69056 | -17.429  | -17.0843 | -5.11483 |
| Xanthine        | 3.436826 | 1.019513 | -14.8447 | 5.38325  | 3.888167 | 16.47467 | -0.76628 | -16.6423 | -17.2323 | -16.3946 |
| Citric acid     | -1.6895  | 1.41724  | -1.96781 | 4.836589 | 2.953364 | -3.52089 | -2.12718 | -0.55964 | -1.05097 | -0.48874 |

| Compound        | C01      | C02      | C04      | C06      | C07      | C08      | C09      | C10      | C11      | C12      |
|-----------------|----------|----------|----------|----------|----------|----------|----------|----------|----------|----------|
| Methionine      | 0.288908 | -0.63947 | -1.19253 | -1.19253 | -0.46289 | 1.044411 | 0.449908 | 0.758239 | -15.3555 | -15.1653 |
| Acetylcarnitine | -1.48139 | -2.01932 | -6.37668 | -6.37668 | -21.5787 | -0.32112 | -0.60641 | -0.07723 | 1.260469 | 1.460697 |
| LysoPE          | 0.136597 | 2.197487 | 0        | 0        | 2.745554 | -14.6552 | -15.5783 | 4.908103 | 8.045706 | 8.310926 |
| LysoPC          | -0.04553 | 0.898941 | 0        | 0        | 0.799391 | -14.6552 | 1.990923 | 3.383918 | 7.586657 | 7.175063 |
| Uric acid       | 0.332503 | 0.421918 | -2.46734 | -2.46734 | 0.748223 | 1.93222  | 0.764401 | 1.376871 | -16.6303 | -16.4401 |
| Pipecolic acid  | 0.159181 | -16.8674 | -0.41041 | -0.41041 | 0.695191 | 1.615171 | -15.9887 | -15.6529 | -14.5734 | 3.745514 |
| Tyrosine        | 0.169875 | -0.78025 | -4.43233 | -4.43233 | 0.005013 | -19.0876 | 0.427975 | 0.728141 | -18.5953 | -18.4051 |
| 5-Oxoproline    | 0.003806 | -1.01848 | -2.23982 | -2.23982 | -0.37732 | 0.31495  | 0.142653 | 0.515841 | -16.4028 | -16.2126 |
| Hypoxanthine    | -0.01277 | -1.20999 | -1.27271 | -1.27271 | -16.4748 | 0.815779 | 0.755722 | 1.424882 | -15.4357 | -15.2455 |
| Xanthine        | -15.0084 | -0.38962 | 16.09408 | -11.3648 | -1.64337 | 0        | 0.081944 | -0.41022 | -17.7977 | -17.6194 |
| Citric acid     | -1.5884  | -2.54918 | 17.15392 | 4.426892 | -1.2953  | 15.73068 | -1.54395 | -1.71026 | -2.08562 | -1.76076 |

| Compound        | C03      | C05      | D01      | D02      | D04      | D06      | D07      | D09      | D10      | D11      |
|-----------------|----------|----------|----------|----------|----------|----------|----------|----------|----------|----------|
| Methionine      | -1.19253 | -1.19253 | -0.34289 | 0.318425 | -1.19253 | -1.19253 | -1.19253 | 0.734274 | -0.54163 | -16.4054 |
| Acetylcarnitine | -6.37668 | -6.37668 | -2.16817 | -0.42153 | -6.37668 | -6.37668 | -6.37668 | -0.22369 | -1.2822  | 0.200723 |
| LysoPE          | 0        | 0        | 1.184795 | 3.014463 | 0        | 0        | 0        | 3.129793 | 2.034315 | 6.344944 |
| LysoPC          | 0        | 0        | -1.10959 | 1.636389 | 0        | 0        | 0        | 1.751202 | 1.232576 | 5.829676 |
| Uric acid       | -2.46734 | -2.46734 | -0.3202  | 0.389245 | -2.46734 | -2.46734 | -2.46734 | 0.328748 | -0.40647 | -17.6802 |
| Pipecolic acid  | -0.41041 | -0.41041 | -0.06292 | 0.57133  | -0.41041 | -0.41041 | -0.41041 | -15.7817 | -17.0507 | 2.216151 |
| Tyrosine        | -4.43233 | -4.43233 | -0.77333 | -0.15496 | -4.43233 | -4.43233 | -4.43233 | 0.519486 | -0.71897 | -19.6452 |
| 5-Oxoproline    | 13.93914 | -2.23982 | -0.86322 | 0.309764 | 13.2028  | -2.23982 | -2.23982 | 0.118966 | -0.62231 | -17.4527 |
| Hypoxanthine    | -1.27271 | -1.27271 | -0.64853 | 0.01277  | -1.27271 | -1.27271 | -1.27271 | 0.774551 | -0.58278 | -16.4856 |
| Xanthine        | 0        | -14.9179 | -14.9085 | -0.27406 | 0        | -0.02936 | 0.061715 | 0        | -1.96003 | 0        |
| Citric acid     | -3.52089 | 1.682149 | -1.54155 | 0.09727  | 16.81851 | 0.30861  | -18.7187 | 13.09107 | -1.56615 | -3.52089 |

| Compound         | D12      | DO3      | DO5      | E01      | E02      | E03      | E04      | E05      | E06      | E08      |
|------------------|----------|----------|----------|----------|----------|----------|----------|----------|----------|----------|
| Methionine       | -15.8402 | -1.19253 | -1.19253 | -0.29614 | -0.00745 | 14.86928 | -4.55975 | -1.19253 | -16.8803 | -15.4767 |
| Acetylcarnitine  | 0.69134  | -6.37668 | -6.37668 | -1.82738 | -0.27851 | -6.37668 | 12.0377  | 15.25067 | 0.054145 | 0.219247 |
| LysoPE           | 7.186951 | 0        | 0        | -16.3715 | 0.817972 | 0        | -3.36722 | 0        | -15.6877 | -14.2842 |
| LysoPC           | 5.78158  | 0        | 0        | 0.031206 | -0.26003 | 0        | 16.40037 | 20.52036 | 4.459282 | 5.945543 |
| Uric acid        | -17.115  | -2.46734 | -2.46734 | -0.32599 | 0.563527 | -2.46734 | -5.83456 | -2.46734 | -18.1551 | -16.7515 |
| Pipelicolic acid | -15.0581 | -0.41041 | -0.41041 | -0.00831 | 0.512977 | -0.41041 | 13.53241 | 17.03616 | 1.118949 | 3.180669 |
| Tyrosine         | -19.08   | -4.43233 | -4.43233 | -0.66313 | -0.18095 | -4.43233 | -7.79955 | -4.43233 | -20.1201 | 1.176741 |
| 5-Oxoproline     | -16.8875 | 13.42127 | -2.23982 | -0.60942 | -0.06299 | 14.68312 | -5.60704 | -2.23982 | -17.9276 | 1.214965 |
| Hypoxanthine     | -15.9204 | -1.27271 | -1.27271 | -0.35175 | -1.2249  | 14.48124 | -4.63993 | -1.27271 | -16.9604 | -15.5569 |
| Xanthine         | -15.4165 | 15.19256 | 0        | -15.2482 | 0        | -0.16808 | -17.9567 | -18.137  | -18.7448 | -19.0127 |
| Citric acid      | -0.09727 | 16.80402 | 16.64008 | -1.90972 | 13.98628 | -0.74038 | -1.85093 | -3.51349 | -3.3835  | -3.8509  |

Table B: LCMS/QTOF intensity readings for the 11 identified differential metabolites in colorectal patients.

| Compound         | C181     | C187     | C190     | C194     | C200     | C273     | C288     | C289     | C298     | C330     |
|------------------|----------|----------|----------|----------|----------|----------|----------|----------|----------|----------|
| Methionine       | 13.41624 | 14.29697 | 15.04859 | 13.28187 | 0.211723 | -1.19253 | 14.92334 | 13.35044 | 13.9034  | 1.760199 |
| Acetylcarnitine  | 13.29178 | 13.69093 | 14.3324  | 12.49465 | -0.70884 | 16.10717 | 12.70555 | 12.50529 | 13.67567 | 0.859902 |
| LysoPE           | 0        | 0        | 0        | 0        | 1.018355 | 20.43334 | 0        | 0        | 0        | -14.5847 |
| LysoPC           | 0        | 0        | 0        | 0        | -0.07396 | 0        | 0        | 0        | 0        | -14.5847 |
| Uric acid        | 14.87426 | 15.17857 | 15.25892 | 13.58841 | 0.863674 | -2.46734 | 13.88651 | 14.88682 | -2.46734 | 0.478961 |
| Pipelicolic acid | -0.41041 | -0.41041 | 15.07815 | -0.41041 | 0.406342 | -0.41041 | -0.41041 | -0.41041 | -0.41041 | 2.17308  |
| Tyrosine         | 13.22622 | 13.52718 | 14.68103 | 12.70999 | -0.00501 | -4.43233 | 13.874   | 12.75306 | 13.73674 | 0.954625 |
| 5-Oxoproline     | -2.23982 | 15.0236  | -2.23982 | 12.44499 | 0.375818 | -2.23982 | 15.471   | 13.77016 | -2.23982 | 1.657205 |
| Hypoxanthine     | 13.2722  | 16.08451 | 14.5066  | 12.67639 | 0.981828 | -1.27271 | 14.08375 | -1.27271 | 17.27772 | 2.057726 |
| Xanthine         | 3.746219 | 5.042977 | 15.91485 | 13.93138 | 3.849494 | 0        | 0        | 4.247788 | -14.0155 | 0        |
| Citric acid      | 5.777569 | 4.983871 | 15.92267 | 15.64035 | 1.083953 | -3.52089 | 15.57789 | 4.728128 | 1.388138 | 13.56608 |

| Compound        | C335     | C341     | C353     | C354     | C358     | C372     | C373     | C379     | C380     | C388     |
|-----------------|----------|----------|----------|----------|----------|----------|----------|----------|----------|----------|
| Methionine      | 0.628776 | -0.42612 | -1.19253 | 14.3764  | 13.50752 | 13.16728 | 15.70975 | 0.73321  | 0.635217 | -1.17703 |
| Acetylcarnitine | -1.20429 | -2.2012  | 16.09324 | 13.02026 | 12.49412 | 13.19617 | 15.65208 | -0.05414 | -0.13228 | -0.08588 |
| LysoPE          | -0.22793 | -16.2681 | 0        | 0        | 0        | 0        | 0        | -15.4748 | -15.0064 | -15.4944 |
| LysoPC          | -15.6623 | 0.224083 | 0        | 0        | 0        | 0        | 0        | 0.090118 | 1.677884 | -15.4944 |
| Uric acid       | 0.794704 | -0.14095 | -2.46734 | 14.12966 | 14.73565 | 13.56556 | 15.97128 | 1.211024 | 0.904102 | 0.768686 |
| Pipecolic acid  | -0.04463 | -0.0476  | 16.91077 | -0.41041 | -0.41041 | -0.41041 | 15.8646  | 0.882184 | 0.772335 | 0.165318 |
| Tyrosine        | 0.141529 | -0.40724 | -4.43233 | 13.22726 | 12.26156 | 12.52585 | 15.25263 | 0.470189 | 0.634651 | -0.55605 |
| 5-Oxoproline    | -0.27909 | -0.64402 | -2.23982 | 13.59751 | 14.09641 | 14.13427 | 15.70967 | 1.822232 | 0.7213   | -0.5451  |
| Hypoxanthine    | 0.064988 | -17.5408 | 19.96642 | 13.36482 | 15.72376 | 12.2912  | 17.52545 | 3.55724  | 1.499454 | -0.02467 |
| Xanthine        | -15.5948 | -1.22942 | -10.4086 | 14.89121 | 0        | 0        | 3.836943 | 15.40245 | -10.3155 | -10.1139 |
| Citric acid     | -2.39265 | -3.60967 | 5.727039 | 15.26661 | 14.31541 | 14.86824 | 3.796709 | 13.31105 | 3.223976 | 3.484183 |

| Compound        | C396     | C398     | C401     | C404     | C414     | C418     | C420     | C431     | C434     | C437     |
|-----------------|----------|----------|----------|----------|----------|----------|----------|----------|----------|----------|
| Methionine      | -0.02249 | 1.89247  | 14.88318 | 16.20381 | 16.55495 | 14.68793 | 14.45762 | 0.668318 | 17.2657  | 14.23042 |
| Acetylcarnitine | -0.25585 | 0.96634  | 13.82709 | 12.77578 | 15.61458 | 14.06048 | 13.18706 | 0.632602 | 14.84685 | 12.86953 |
| LysoPE          | 1.44346  | -13.9164 | 0        | 0        | 0        | 0        | 0        | -14.9802 | 0        | 0        |
| LysoPC          | 0.158643 | -13.9164 | 0        | 0        | 0        | 0        | 0        | 0.002811 | 0        | 0        |
| Uric acid       | 0.364347 | 1.028956 | 15.47462 | -2.46734 | -2.46734 | 14.8206  | 14.02422 | 1.098414 | 13.8184  | -2.46734 |
| Pipecolic acid  | 0.067337 | 1.741258 | -0.41041 | -0.41041 | 16.78589 | -0.41041 | -0.41041 | 1.568198 | 16.56255 | -0.41041 |
| Tyrosine        | -0.50514 | 1.601004 | 14.37913 | -4.43233 | 16.26447 | 14.38386 | 14.24128 | 0.683806 | 16.45187 | 13.54978 |
| 5-Oxoproline    | 0.148748 | 2.943988 | 15.10017 | 15.00274 | 17.15963 | 14.95253 | 15.28677 | 2.649568 | 18.64796 | 14.8478  |
| Hypoxanthine    | 1.767304 | 3.949158 | 15.87474 | 14.35346 | -1.27271 | 16.70155 | 15.68395 | 2.033979 | 20.71756 | 16.11061 |
| Xanthine        | 0        | 14.42476 | 0.516785 | 17.84465 | 14.16349 | 4.616601 | -0.41122 | 14.59852 | 17.64147 | 15.72393 |
| Citric acid     | 12.93984 | 12.82526 | 0.802177 | 14.79413 | 12.77673 | 5.755894 | -1.09368 | 12.26426 | 15.43636 | 13.94889 |

| Compound        | C438     | C445     | C449     | C450     | C459     | C467     | C469     | C474     | C476     | C482     |
|-----------------|----------|----------|----------|----------|----------|----------|----------|----------|----------|----------|
| Methionine      | 13.19184 | 15.09741 | -1.19253 | 0.007452 | 14.95208 | 14.0689  | -1.19253 | -1.19253 | -0.04541 | -0.36769 |
| Acetylcarnitine | -6.37668 | 13.60549 | 15.39855 | -0.13921 | 13.7823  | 12.6316  | 15.87351 | 16.02099 | 0.265836 | -1.25593 |
| LysoPE          | 0        | 0        | 0        | -15.5663 | 0        | 0        | 0        | 0        | 1.79615  | 2.522778 |
| LysoPC          | 0        | 0        | 0        | -15.5663 | 0        | 0        | 0        | 0        | -0.87815 | 1.008295 |
| Uric acid       | -2.46734 | 14.31584 | -2.46734 | 0.923309 | 14.84528 | 12.94026 | -2.46734 | -2.46734 | 0.354087 | 0.258849 |
| Pipecolic acid  | -0.41041 | -0.41041 | 17.37063 | 0.008307 | -0.41041 | -0.41041 | 17.50268 | -0.41041 | 1.219674 | 0.148643 |
| Tyrosine        | 13.1568  | 13.70684 | 15.53402 | -0.32417 | 14.42045 | 13.35659 | 15.23206 | -4.43233 | 1.041077 | -0.35575 |
| 5-Oxoproline    | 13.69671 | 15.00795 | -2.23982 | 0.442635 | 15.18455 | 14.86652 | -2.23982 | -2.23982 | -0.00381 | -0.42072 |
| Hypoxanthine    | -1.27271 | 15.86889 | -1.27271 | 1.898755 | 17.76941 | 16.65653 | -1.27271 | -1.27271 | 1.970247 | 1.771185 |
| Xanthine        | 14.89031 | 15.48564 | -16.7677 | 9.185621 | 6.65139  | 4.601765 | -16.5671 | -10.9812 | 14.86424 | -0.44895 |
| Citric acid     | -3.52089 | -3.52089 | -1.13494 | -13.5862 | 4.146317 | -15.2497 | -2.6644  | -14.5021 | 13.24431 | -1.24324 |

| Compound        | C483     | C484     | C485     | C488     | C497     | C498     | C500     | C501     | C503     | C507     |
|-----------------|----------|----------|----------|----------|----------|----------|----------|----------|----------|----------|
| Methionine      | 2.560803 | 1.407015 | -1.19253 | 14.20871 | 14.00041 | 12.89641 | 13.10995 | -1.19253 | 1.257127 | -1.19253 |
| Acetylcarnitine | 0.669562 | 0.662065 | 15.26133 | 12.87932 | 11.59832 | 11.62795 | 11.43066 | 15.35454 | -0.28964 | 14.06737 |
| LysoPE          | -14.3773 | 3.912405 | 0        | 0        | 0        | -3.68113 | -3.59512 | 0        | 0.970167 | 0        |
| LysoPC          | -14.3773 | -0.45623 | 0        | 0        | 0        | 12.73504 | 11.50283 | 0        | -0.24274 | 0        |
| Uric acid       | -16.8446 | 0.522264 | -2.46734 | 12.76328 | 11.98168 | 12.4221  | 12.01271 | -2.46734 | -17.4448 | -2.46734 |
| Pipecolic acid  | 1.602168 | 1.563609 | -0.41041 | -0.41041 | -0.41041 | -4.09154 | 13.28081 | -0.41041 | 1.08979  | 16.42405 |
| Tyrosine        | 1.536948 | 1.12267  | -4.43233 | 13.64179 | 13.48411 | 12.62825 | 12.61736 | 15.40807 | 0.902862 | 15.26931 |
| 5-Oxoproline    | 1.212556 | 2.84674  | -2.23982 | 14.30601 | 13.38203 | 13.41919 | 12.8825  | -2.23982 | 0.577881 | -2.23982 |
| Hypoxanthine    | 1.449518 | 1.778832 | 19.22808 | 16.37382 | 17.37713 | -4.95384 | 14.71762 | 20.28928 | 3.355714 | -1.27271 |
| Xanthine        | 0        | 5.02523  | -12.6812 | 15.63793 | 1.88006  | 13.87489 | 15.32938 | -16.2946 | 14.5205  | -16.6249 |
| Citric acid     | 13.55732 | 3.838162 | 3.127121 | 15.39177 | 1.254246 | 13.76254 | 12.7832  | -3.09319 | 11.25796 | -3.90534 |

Note: Codes refer to individual subjects

Table S2. Prediction of new samples (20 CRC and 20 Normal) using 11 panel of biomarkers.

| Normal |         |   | Cancer |         |   |
|--------|---------|---|--------|---------|---|
| A01v   | 0.92    | 1 | C325v  | 0.77667 | 0 |
| A02v   | 0.73333 | 1 | C511v  | 0.75    | 0 |
| A03v   | 0.85667 | 0 | C547v  | 0.87667 | 0 |
| A04v   | 0.86667 | 1 | C552v  | 0.81333 | 0 |
| A05v   | 0.70667 | 1 | C569v  | 0.52667 | 0 |
| A06v   | 0.71333 | 1 | C570v  | 0.63333 | 0 |
| A07v   | 0.82333 | 1 | C584v  | 0.54667 | 0 |
| A07vv  | 0.92    | 1 | C603v  | 0.87667 | 0 |
| A08v   | 0.85    | 0 | C647v  | 0.94667 | 0 |
| A09v   | 0.83    | 1 | C656v  | 0.82667 | 0 |
| A10v   | 0.72667 | 1 | C658v  | 0.69333 | 1 |
| A11v   | 0.74333 | 1 | C660v  | 0.89667 | 0 |
| A12v   | 0.71    | 1 | C662v  | 0.85333 | 0 |

|      |         |   |       |         |   |
|------|---------|---|-------|---------|---|
| B01v | 0.76    | 1 | C663v | 0.74    | 0 |
| B02v | 0.51    | 0 | C666v | 0.59667 | 0 |
| B03v | 0.67333 | 1 | C667v | 0.67333 | 1 |
| B04v | 0.89333 | 1 | C668v | 0.68    | 0 |
| B05v | 0.79333 | 1 | C669v | 0.84    | 1 |
| B06v | 0.84    | 1 | C678v | 0.74    | 0 |
| B07v | 0.89    | 0 | C679v | 0.65667 | 1 |



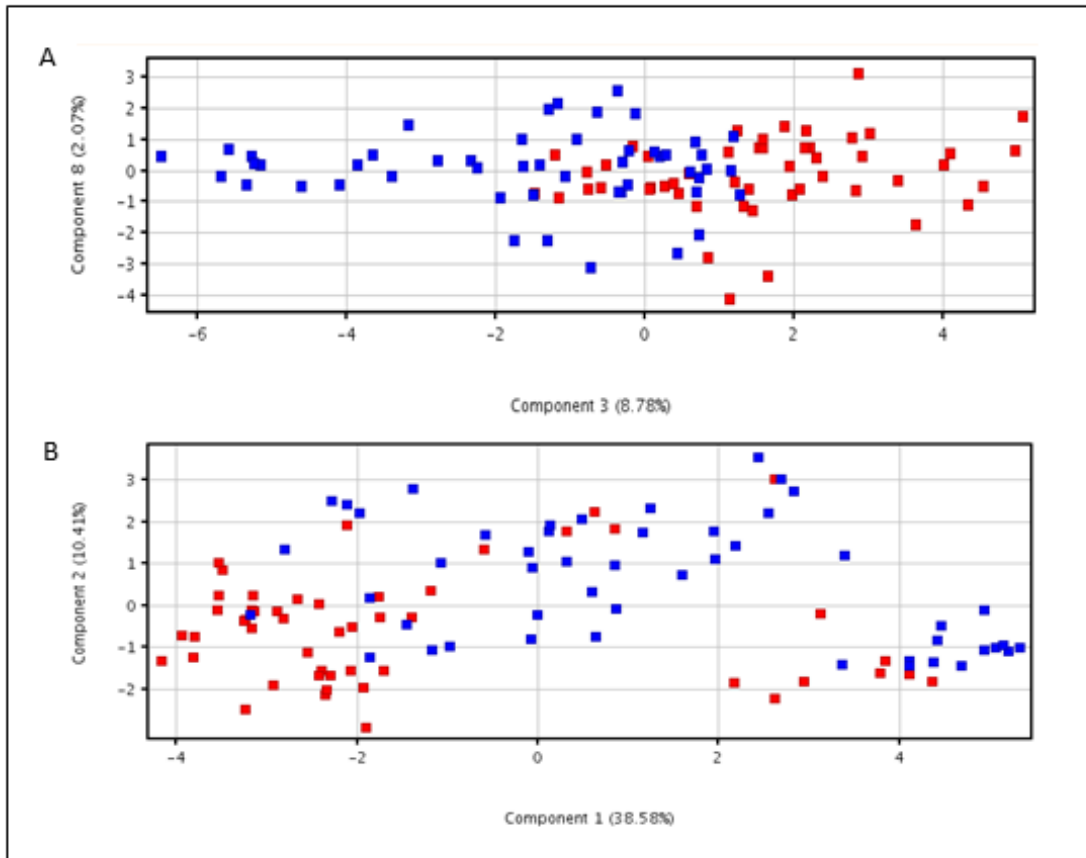

Fig. S1. A) 2D-PCA Score Plot for Patients and Healthy Volunteers in Positive Ion Mode.

B) 2D-PCA Score Plot for Patients and Healthy Volunteers in Negative Ion Mode.

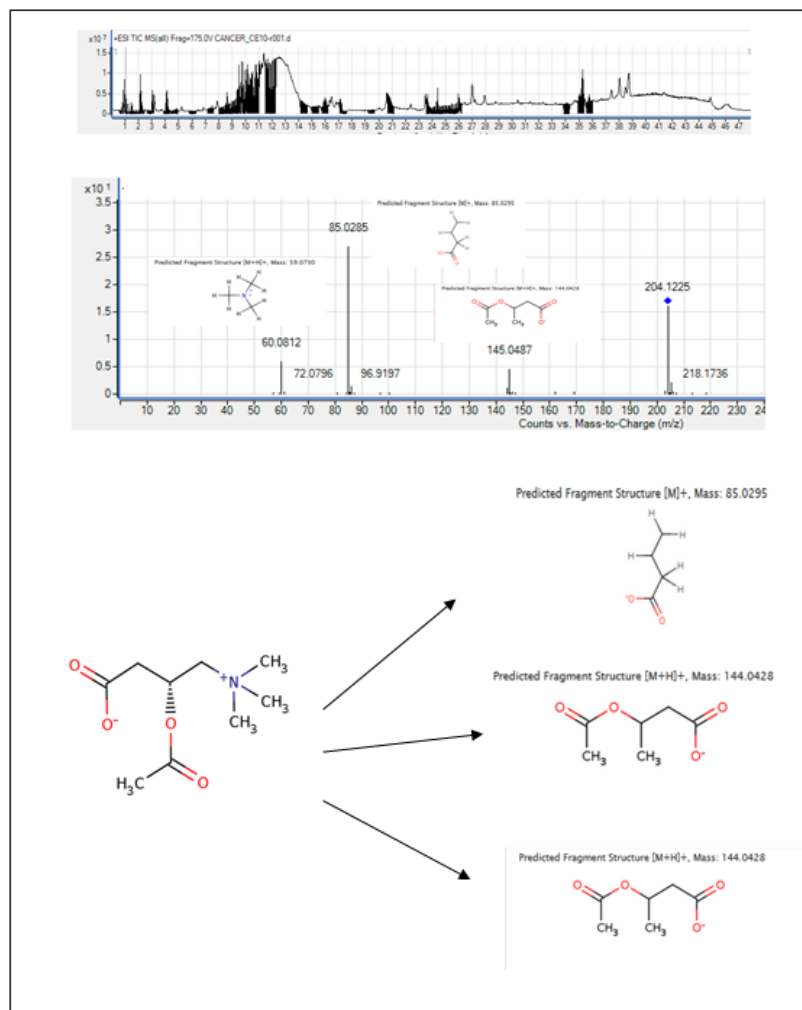

Fig. S2. Full chromatogram of CRC pooled samples with fragmented ions of acetylcarnitine.
